# Supplementary material for: Insights into the Pathobiology of TMPRSS3-Related Hearing Loss and Implications for Cochlear Implant Patients with TMPRSS3 Mutations.
Source: Research Square preprint supplement (doi:10.21203/rs.3.rs-632257/v1), 2021-06-22
Supplement: Supplementary file 1 [file 469c2ea24e761ea2783e415f.xlsx]

## Sheet: Supp_Table_1
Location	Allele	Consequence	IMPACT	SYMBOL	Gene	Feature_type	Feature	BIOTYPE	EXON	INTRON	HGVSc	HGVSp	cDNA_position	CDS_position	Protein_position	Amino_acids	Codons	Existing_variation	DISTANCE	STRAND	FLAGS	SYMBOL_SOURCE	HGNC_ID	MANE_SELECT	MANE_PLUS_CLINICAL	TSL	APPRIS	ENSP	SWISSPROT	TREMBL	UNIPARC	UNIPROT_ISOFORM	REFSEQ_MATCH	REFSEQ_OFFSET	GIVEN_REF	USED_REF	BAM_EDIT	SIFT	PolyPhen	HGVS_OFFSET	AF	AFR_AF	AMR_AF	EAS_AF	EUR_AF	SAS_AF	AA_AF	EA_AF	gnomAD_AF
21:43795896-43795896	T	missense_variant	MODERATE	TMPRSS3	64699	Transcript	NM_024022.4	protein_coding	12/13	-	NM_024022.4:c.1276G>A	NP_076927.1:p.Ala426Thr	1438	1276	426	A/T	Gca/Aca	rs56264519,CM116227	-	-1	-	EntrezGene	-	-	-	.,1,1,5	alternative1,principal3,principal3,alternative1	NP_076927.1	-	-	-	-	-	-	C	C	-	deleterious(0)	probably_damaging(0.989)	-	0.0004	0.0008	0	0	0.001	0	0	0.002093	9.42064e-07
21:43795961-43795961	A	missense_variant	MODERATE	TMPRSS3	64699	Transcript	NM_024022.4	protein_coding	12/13	-	NM_024022.4:c.1211C>T	NP_076927.1:p.Pro404Leu	1373	1211	404	P/L	cCc/cTc	rs28939084,CM012477	-	-1	-	EntrezGene	-	-	-	.,1,1,5	alternative1,principal3,principal3,alternative1	NP_076927.1	-	-	-	-	-	-	G	G	-	deleterious(0)	probably_damaging(1)	-	-	-	-	-	-	-	-	-	1.42325e-10
21:43803171-43803171	G	missense_variant	MODERATE	TMPRSS3	64699	Transcript	NM_024022.4	protein_coding	8/13	-	NM_024022.4:c.753G>C	NP_076927.1:p.Trp251Cys	915	753	251	W/C	tgG/tgC	rs137852999,CM012476,COSV104621099	-	-1	-	EntrezGene	-	-	-	.,1,1,5,1	alternative1,principal3,principal3,alternative1,.	NP_076927.1	-	-	-	-	-	-	C	C	-	deleterious(0)	probably_damaging(1)	-	-	-	-	-	-	-	-	-	-
21:43803277-43803277	A	missense_variant	MODERATE	TMPRSS3	64699	Transcript	NM_024022.4	protein_coding	8/13	-	NM_024022.4:c.647G>T	NP_076927.1:p.Arg216Leu	809	647	216	R/L	cGc/cTc	rs137853000,CM054158,CM1513228,COSV52301947	-	-1	-	EntrezGene	-	-	-	.,1,1,5,1	alternative1,principal3,principal3,alternative1,.	NP_076927.1	-	-	-	-	-	-	C	C	-	deleterious(0.01)	probably_damaging(0.996)	-	-	-	-	-	-	-	-	-	-
21:43808633-43808633	A	missense_variant,splice_region_variant	MODERATE	TMPRSS3	64699	Transcript	NM_024022.4	protein_coding	5/13	-	NM_024022.4:c.325C>T	NP_076927.1:p.Arg109Trp	487	325	109	R/W	Cgg/Tgg	rs201632198,CM011820	-	-1	-	EntrezGene	-	-	-	.,1,1,5,1	alternative1,principal3,principal3,alternative1,.	NP_076927.1	-	-	-	-	-	-	G	G	-	deleterious(0)	probably_damaging(0.989)	-	-	-	-	-	-	-	-	-	1.72397e-08
21:43809052-43809052	C	missense_variant	MODERATE	TMPRSS3	64699	Transcript	NM_024022.4	protein_coding	4/13	-	NM_024022.4:c.308A>G	NP_076927.1:p.Asp103Gly	470	308	103	D/G	gAc/gGc	rs387906915,CM020321	-	-1	-	EntrezGene	-	-	-	.,1,1,5,1	alternative1,principal3,principal3,alternative1,.	NP_076927.1	-	-	-	-	-	-	T	T	-	deleterious(0)	probably_damaging(1)	-	-	-	-	-	-	-	-	-	-
21:43795829-43795829	G	missense_variant	MODERATE	TMPRSS3	64699	Transcript	NM_024022.4	protein_coding	12/13	-	NM_024022.4:c.1343T>C	NP_076927.1:p.Met448Thr	1505	1343	448	M/T	aTg/aCg	rs201018751	-	-1	-	EntrezGene	-	-	-	.,1,1,5	alternative1,principal3,principal3,alternative1	NP_076927.1	-	-	-	-	-	-	A	A	-	deleterious(0)	benign(0.135)	-	-	-	-	-	-	-	-	-	3.95612e-10
21:43795836-43795836	T	missense_variant	MODERATE	TMPRSS3	64699	Transcript	NM_024022.4	protein_coding	12/13	-	NM_024022.4:c.1336G>A	NP_076927.1:p.Glu446Lys	1498	1336	446	E/K	Gag/Aag	rs777595673,CM122452,COSV99368817	-	-1	-	EntrezGene	-	-	-	.,1,1,5	alternative1,principal3,principal3,alternative1	NP_076927.1	-	-	-	-	-	-	C	C	-	tolerated(0.39)	benign(0.295)	-	-	-	-	-	-	-	-	-	6.32979e-11
21:43795866-43795866	A	missense_variant	MODERATE	TMPRSS3	64699	Transcript	NM_024022.4	protein_coding	12/13	-	NM_024022.4:c.1306C>T	NP_076927.1:p.Arg436Cys	1468	1306	436	R/C	Cgt/Tgt	rs565348874,CM165509,COSV52303877	-	-1	-	EntrezGene	-	-	-	.,1,1,5	alternative1,principal3,principal3,alternative1	NP_076927.1	-	-	-	-	-	-	G	G	-	deleterious(0)	probably_damaging(0.993)	-	0.0004	0	0.0014	0	0.001	0	-	-	1.28164e-09
21:43795866-43795866	C	missense_variant	MODERATE	TMPRSS3	64699	Transcript	NM_024022.4	protein_coding	12/13	-	NM_024022.4:c.1306C>G	NP_076927.1:p.Arg436Gly	1468	1306	436	R/G	Cgt/Ggt	rs565348874,CM165509,COSV52303877	-	-1	-	EntrezGene	-	-	-	.,1,1,5	alternative1,principal3,principal3,alternative1	NP_076927.1	-	-	-	-	-	-	G	G	-	deleterious(0.04)	probably_damaging(0.962)	-	-	-	-	-	-	-	-	-	1.58245e-11
21:43795881-43795881	A	missense_variant	MODERATE	TMPRSS3	64699	Transcript	NM_024022.4	protein_coding	12/13	-	NM_024022.4:c.1291C>T	NP_076927.1:p.Pro431Ser	1453	1291	431	P/S	Cct/Tct	rs767931569,CM144560	-	-1	-	EntrezGene	-	-	-	.,1,1,5	alternative1,principal3,principal3,alternative1	NP_076927.1	-	-	-	-	-	-	G	G	-	deleterious(0)	probably_damaging(0.998)	-	-	-	-	-	-	-	-	-	5.69777e-10
21:43795886-43795886	C	missense_variant	MODERATE	TMPRSS3	64699	Transcript	NM_024022.4	protein_coding	12/13	-	NM_024022.4:c.1286A>G	NP_076927.1:p.Asn429Ser	1448	1286	429	N/S	aAc/aGc	rs144344468,CM165508	-	-1	-	EntrezGene	-	-	-	.,1,1,5	alternative1,principal3,principal3,alternative1	NP_076927.1	-	-	-	-	-	-	T	T	-	deleterious(0.02)	possibly_damaging(0.907)	-	-	-	-	-	-	-	0.000227	0	1.58245e-09
21:43795893-43795893	T	missense_variant	MODERATE	TMPRSS3	64699	Transcript	NM_024022.4	protein_coding	12/13	-	NM_024022.4:c.1279G>A	NP_076927.1:p.Glu427Lys	1441	1279	427	E/K	Gag/Aag	CM122451	-	-1	-	EntrezGene	-	-	-	.,1,1,5	alternative1,principal3,principal3,alternative1	NP_076927.1	-	-	-	-	-	-	C	C	-	tolerated(1)	benign(0.015)	-	-	-	-	-	-	-	-	-	-
21:43795899-43795899	G	missense_variant	MODERATE	TMPRSS3	64699	Transcript	NM_024022.4	protein_coding	12/13	-	NM_024022.4:c.1273T>C	NP_076927.1:p.Cys425Arg	1435	1273	425	C/R	Tgc/Cgc	CM124938	-	-1	-	EntrezGene	-	-	-	.,1,1,5	alternative1,principal3,principal3,alternative1	NP_076927.1	-	-	-	-	-	-	A	A	-	deleterious(0)	probably_damaging(0.999)	-	-	-	-	-	-	-	-	-	-
21:43795919-43795919	A	missense_variant	MODERATE	TMPRSS3	64699	Transcript	NM_024022.4	protein_coding	12/13	-	NM_024022.4:c.1253C>T	NP_076927.1:p.Ala418Val	1415	1253	418	A/V	gCg/gTg	rs377531325,COSV52306920	-	-1	-	EntrezGene	-	-	-	.,1,1,5	alternative1,principal3,principal3,alternative1	NP_076927.1	-	-	-	-	-	-	G	G	-	tolerated(1)	benign(0.034)	-	-	-	-	-	-	-	0.000227	0	7.6545e-09
21:43795922-43795922	T	missense_variant	MODERATE	TMPRSS3	64699	Transcript	NM_024022.4	protein_coding	12/13	-	NM_024022.4:c.1250G>A	NP_076927.1:p.Gly417Glu	1412	1250	417	G/E	gGa/gAa	-	-	-1	-	EntrezGene	-	-	-	.,1,1,5	alternative1,principal3,principal3,alternative1	NP_076927.1	-	-	-	-	-	-	C	C	-	deleterious(0)	probably_damaging(1)	-	-	-	-	-	-	-	-	-	-
21:43795928-43795928	G	missense_variant	MODERATE	TMPRSS3	64699	Transcript	NM_024022.4	protein_coding	12/13	-	NM_024022.4:c.1244T>C	NP_076927.1:p.Leu415Ser	1406	1244	415	L/S	tTa/tCa	rs984312945	-	-1	-	EntrezGene	-	-	-	.,1,1,5	alternative1,principal3,principal3,alternative1	NP_076927.1	-	-	-	-	-	-	A	A	-	deleterious(0)	probably_damaging(0.998)	-	-	-	-	-	-	-	-	-	-
21:43795953-43795953	G	missense_variant	MODERATE	TMPRSS3	64699	Transcript	NM_024022.4	protein_coding	12/13	-	NM_024022.4:c.1219T>C	NP_076927.1:p.Cys407Arg	1381	1219	407	C/R	Tgt/Cgt	rs773780151,CM011822	-	-1	-	EntrezGene	-	-	-	.,1,1,5	alternative1,principal3,principal3,alternative1	NP_076927.1	-	-	-	-	-	-	A	A	-	deleterious(0)	possibly_damaging(0.739)	-	-	-	-	-	-	-	-	-	1.28164e-09
21:43795968-43795968	T	missense_variant	MODERATE	TMPRSS3	64699	Transcript	NM_024022.4	protein_coding	12/13	-	NM_024022.4:c.1204G>A	NP_076927.1:p.Gly402Arg	1366	1204	402	G/R	Ggg/Agg	rs1374533426,COSV52303747	-	-1	-	EntrezGene	-	-	-	.,1,1,5	alternative1,principal3,principal3,alternative1	NP_076927.1	-	-	-	-	-	-	C	C	-	deleterious(0)	probably_damaging(1)	-	-	-	-	-	-	-	-	-	-
21:43795978-43795978	G	splice_acceptor_variant	HIGH	TMPRSS3	64699	Transcript	NM_024022.4	protein_coding	-	11/12	NM_024022.4:c.1195-1G>C	-	-	-	-	-	-	rs1601514990,CS115318	-	-1	-	EntrezGene	-	-	-	-	-	NP_076927.1	-	-	-	-	-	-	C	C	-	-	-	-	-	-	-	-	-	-	-	-	-
21:43796652-43796652	A	stop_gained,splice_region_variant	HIGH	TMPRSS3	64699	Transcript	NM_024022.4	protein_coding	11/13	-	NM_024022.4:c.1192C>T	NP_076927.1:p.Gln398Ter	1354	1192	398	Q/*	Cag/Tag	rs727504304,CM054157	-	-1	-	EntrezGene	-	-	-	.,1,1,5	alternative1,principal3,principal3,alternative1	NP_076927.1	-	-	-	-	-	-	G	G	-	-	-	-	-	-	-	-	-	-	-	-	-
21:43796656-43796664	AGATCAGTGCAGAGTGGGTGATCAGTGATC	stop_gained,frameshift_variant	HIGH	TMPRSS3	64699	Transcript	NM_024022.4	protein_coding	11/13	-	NM_024022.4:c.1181_1187delinsATCACTGATCACCCACTCTGCACTGATCT	NP_076927.1:p.Val394AspfsTer3	1342-1349	1180-1187	394-396	VDS/DH*SPTLH*SX	GTGGACAGc/GATCACTGATCACCCACTCTGCACTGATCTc	-	-	-1	-	EntrezGene	-	-	-	-	-	NP_076927.1	-	-	-	-	-	-	CTGTCCAC	CTGTCCAC	-	-	-	-	-	-	-	-	-	-	-	-	-
21:43796685-43796685	T	missense_variant	MODERATE	TMPRSS3	64699	Transcript	NM_024022.4	protein_coding	11/13	-	NM_024022.4:c.1159G>A	NP_076927.1:p.Ala387Thr	1321	1159	387	A/T	Gcg/Acg	rs781376204,CM1310315	-	-1	-	EntrezGene	-	-	-	.,1,1,5	alternative1,principal3,principal3,alternative1	NP_076927.1	-	-	-	-	-	-	C	C	-	deleterious(0.04)	probably_damaging(0.954)	-	-	-	-	-	-	-	-	-	3.96806e-10
21:43796688-43796688	G	missense_variant	MODERATE	TMPRSS3	64699	Transcript	NM_024022.4	protein_coding	11/13	-	NM_024022.4:c.1156T>C	NP_076927.1:p.Cys386Arg	1318	1156	386	C/R	Tgc/Cgc	CM140340	-	-1	-	EntrezGene	-	-	-	.,1,1,5	alternative1,principal3,principal3,alternative1	NP_076927.1	-	-	-	-	-	-	A	A	-	deleterious(0)	probably_damaging(1)	-	-	-	-	-	-	-	-	-	-
21:43796693-43796693	C	missense_variant	MODERATE	TMPRSS3	64699	Transcript	NM_024022.4	protein_coding	11/13	-	NM_024022.4:c.1151T>G	NP_076927.1:p.Met384Arg	1313	1151	384	M/R	aTg/aGg	-	-	-1	-	EntrezGene	-	-	-	.,1,1,5	alternative1,principal3,principal3,alternative1	NP_076927.1	-	-	-	-	-	-	A	A	-	deleterious(0)	probably_damaging(0.992)	-	-	-	-	-	-	-	-	-	-
21:43796715-43796715	T	missense_variant	MODERATE	TMPRSS3	64699	Transcript	NM_024022.4	protein_coding	11/13	-	NM_024022.4:c.1129G>A	NP_076927.1:p.Gly377Ser	1291	1129	377	G/S	Ggt/Agt	rs371448615,CM164477	-	-1	-	EntrezGene	-	-	-	.,1,1,5	alternative1,principal3,principal3,alternative1	NP_076927.1	-	-	-	-	-	-	C	C	-	tolerated(0.13)	probably_damaging(0.939)	-	-	-	-	-	-	-	0.000227	0.0002326	1.06916e-08
21:43800225-43800225	T	splice_donor_variant	HIGH	TMPRSS3	64699	Transcript	NM_024022.4	protein_coding	-	10/12	NM_024022.4:c.1048+1G>A	-	-	-	-	-	-	rs1429442821	-	-1	-	EntrezGene	-	-	-	-	-	NP_076927.1	-	-	-	-	-	-	C	C	-	-	-	-	-	-	-	-	-	-	-	-	-
21:43800235-43800235	A	stop_gained	HIGH	TMPRSS3	64699	Transcript	NM_024022.4	protein_coding	10/13	-	NM_024022.4:c.1039G>T	NP_076927.1:p.Glu347Ter	1201	1039	347	E/*	Gag/Tag	-	-	-1	-	EntrezGene	-	-	-	.,1,1,5	alternative1,principal3,principal3,alternative1	NP_076927.1	-	-	-	-	-	-	C	C	-	-	-	-	-	-	-	-	-	-	-	-	-
21:43800246-43800246	A	missense_variant	MODERATE	TMPRSS3	64699	Transcript	NM_024022.4	protein_coding	10/13	-	NM_024022.4:c.1028G>T	NP_076927.1:p.Trp343Leu	1190	1028	343	W/L	tGg/tTg	rs540715620,COSV52303400,COSV99367635	-	-1	-	EntrezGene	-	-	-	.,1,1,5	alternative1,principal3,principal3,alternative1	NP_076927.1	-	-	-	-	-	-	C	C	-	deleterious(0)	probably_damaging(0.99)	-	0.0002	0	0	0.001	0	0	-	-	1.58404e-11
21:43800249-43800249	T	missense_variant	MODERATE	TMPRSS3	64699	Transcript	NM_024022.4	protein_coding	10/13	-	NM_024022.4:c.1025G>A	NP_076927.1:p.Gly342Glu	1187	1025	342	G/E	gGa/gAa	rs397517368,CM115311	-	-1	-	EntrezGene	-	-	-	.,1,1,5	alternative1,principal3,principal3,alternative1	NP_076927.1	-	-	-	-	-	-	C	C	-	deleterious(0)	probably_damaging(0.997)	-	-	-	-	-	-	-	-	-	6.33457e-11
21:43800255-43800255	C	missense_variant	MODERATE	TMPRSS3	64699	Transcript	NM_024022.4	protein_coding	10/13	-	NM_024022.4:c.1019C>G	NP_076927.1:p.Thr340Arg	1181	1019	340	T/R	aCg/aGg	CM144559	-	-1	-	EntrezGene	-	-	-	.,1,1,5	alternative1,principal3,principal3,alternative1	NP_076927.1	-	-	-	-	-	-	G	G	-	deleterious(0)	possibly_damaging(0.745)	-	-	-	-	-	-	-	-	-	-
21:43800274-43800275	-	frameshift_variant	HIGH	TMPRSS3	64699	Transcript	NM_024022.4	protein_coding	10/13	-	NM_024022.4:c.999del	NP_076927.1:p.Asp334MetfsTer24	1161	999	333	P/X	ccC/cc	rs748150602,COSV52303952	-	-1	-	EntrezGene	-	-	-	-	-	NP_076927.1	-	-	-	-	-	-	G	G	-	-	-	-	-	-	-	-	-	-	-	-	1.42564e-10
21:43800284-43800285	-	frameshift_variant	HIGH	TMPRSS3	64699	Transcript	NM_024022.4	protein_coding	10/13	-	NM_024022.4:c.989del	NP_076927.1:p.Glu330GlyfsTer28	1151	989	330	E/X	gAg/gg	CD068626	-	-1	-	EntrezGene	-	-	-	-	-	NP_076927.1	-	-	-	-	-	-	T	T	-	-	-	-	-	-	-	-	-	-	-	-	-
21:43800300-43800300	T	missense_variant	MODERATE	TMPRSS3	64699	Transcript	NM_024022.4	protein_coding	10/13	-	NM_024022.4:c.974T>A	NP_076927.1:p.Leu325Gln	1136	974	325	L/Q	cTg/cAg	-	-	-1	-	EntrezGene	-	-	-	.,1,1,5	alternative1,principal3,principal3,alternative1	NP_076927.1	-	-	-	-	-	-	A	A	-	deleterious(0)	probably_damaging(0.996)	-	-	-	-	-	-	-	-	-	-
21:43800326-43800326	C	splice_region_variant,intron_variant	LOW	TMPRSS3	64699	Transcript	NM_024022.4	protein_coding	-	9/12	NM_024022.4:c.953-5A>G	-	-	-	-	-	-	-	-	-1	-	EntrezGene	-	-	-	-	-	NP_076927.1	-	-	-	-	-	-	T	T	-	-	-	-	-	-	-	-	-	-	-	-	-
21:43802210-43802210	T	missense_variant	MODERATE	TMPRSS3	64699	Transcript	NM_024022.4	protein_coding	9/13	-	NM_024022.4:c.916G>A	NP_076927.1:p.Ala306Thr	1078	916	306	A/T	Gcc/Acc	rs181949335,CM073384,COSV52305248	-	-1	-	EntrezGene	-	-	-	.,1,1,5,1	alternative1,principal3,principal3,alternative1,.	NP_076927.1	-	-	-	-	-	-	C	C	-	deleterious(0)	probably_damaging(0.993)	-	0.0002	0	0	0.001	0	0	-	-	2.08802e-08
21:43802213-43802213	A	missense_variant	MODERATE	TMPRSS3	64699	Transcript	NM_024022.4	protein_coding	9/13	-	NM_024022.4:c.913A>T	NP_076927.1:p.Ile305Phe	1075	913	305	I/F	Atc/Ttc	CM163794	-	-1	-	EntrezGene	-	-	-	.,1,1,5,1	alternative1,principal3,principal3,alternative1,.	NP_076927.1	-	-	-	-	-	-	T	T	-	deleterious(0)	probably_damaging(0.974)	-	-	-	-	-	-	-	-	-	-
21:43802317-43802317	T	missense_variant	MODERATE	TMPRSS3	64699	Transcript	NM_024022.4	protein_coding	9/13	-	NM_024022.4:c.809T>A	NP_076927.1:p.Ile270Asn	971	809	270	I/N	aTc/aAc	-	-	-1	-	EntrezGene	-	-	-	.,1,1,5,1	alternative1,principal3,principal3,alternative1,.	NP_076927.1	-	-	-	-	-	-	A	A	-	deleterious(0)	benign(0.392)	-	-	-	-	-	-	-	-	-	-
21:43802344-43802344	A	splice_acceptor_variant	HIGH	TMPRSS3	64699	Transcript	NM_024022.4	protein_coding	-	8/12	NM_024022.4:c.783-1G>T	-	-	-	-	-	-	rs1237955948	-	-1	-	EntrezGene	-	-	-	-	-	NP_076927.1	-	-	-	-	-	-	C	C	-	-	-	-	-	-	-	-	-	-	-	-	-
21:43802344-43802344	T	splice_acceptor_variant	HIGH	TMPRSS3	64699	Transcript	NM_024022.4	protein_coding	-	8/12	NM_024022.4:c.783-1G>A	-	-	-	-	-	-	rs1237955948	-	-1	-	EntrezGene	-	-	-	-	-	NP_076927.1	-	-	-	-	-	-	C	C	-	-	-	-	-	-	-	-	-	-	-	-	6.46094e-11
21:43803134-43803134	A	splice_region_variant,intron_variant	LOW	TMPRSS3	64699	Transcript	NM_024022.4	protein_coding	-	8/12	NM_024022.4:c.782+7_782+8insT	-	-	-	-	-	-	-	-	-1	-	EntrezGene	-	-	-	-	-	NP_076927.1	-	-	-	-	-	-	-	-	-	-	-	-	-	-	-	-	-	-	-	-	-
21:43803140-43803140	T	splice_donor_variant	HIGH	TMPRSS3	64699	Transcript	NM_024022.4	protein_coding	-	8/12	NM_024022.4:c.782+2T>A	-	-	-	-	-	-	-	-	-1	-	EntrezGene	-	-	-	-	-	NP_076927.1	-	-	-	-	-	-	A	A	-	-	-	-	-	-	-	-	-	-	-	-	-
21:43803146-43803146	C	missense_variant	MODERATE	TMPRSS3	64699	Transcript	NM_024022.4	protein_coding	8/13	-	NM_024022.4:c.778T>G	NP_076927.1:p.Tyr260Asp	940	778	260	Y/D	Tat/Gat	CM163639	-	-1	-	EntrezGene	-	-	-	.,1,1,5,1	alternative1,principal3,principal3,alternative1,.	NP_076927.1	-	-	-	-	-	-	A	A	-	tolerated(0.31)	benign(0.346)	-	-	-	-	-	-	-	-	-	-
21:43803153-43803153	T	missense_variant	MODERATE	TMPRSS3	64699	Transcript	NM_024022.4	protein_coding	8/13	-	NM_024022.4:c.771C>A	NP_076927.1:p.His257Gln	933	771	257	H/Q	caC/caA	CM151991	-	-1	-	EntrezGene	-	-	-	.,1,1,5,1	alternative1,principal3,principal3,alternative1,.	NP_076927.1	-	-	-	-	-	-	G	G	-	deleterious(0)	probably_damaging(0.999)	-	-	-	-	-	-	-	-	-	-
21:43803153-43803153	C	missense_variant	MODERATE	TMPRSS3	64699	Transcript	NM_024022.4	protein_coding	8/13	-	NM_024022.4:c.771C>G	NP_076927.1:p.His257Gln	933	771	257	H/Q	caC/caG	CM151991	-	-1	-	EntrezGene	-	-	-	.,1,1,5,1	alternative1,principal3,principal3,alternative1,.	NP_076927.1	-	-	-	-	-	-	G	G	-	deleterious(0)	probably_damaging(0.999)	-	-	-	-	-	-	-	-	-	-
21:43803157-43803157	A	missense_variant	MODERATE	TMPRSS3	64699	Transcript	NM_024022.4	protein_coding	8/13	-	NM_024022.4:c.767C>T	NP_076927.1:p.Ala256Val	929	767	256	A/V	gCa/gTa	rs1306292205,CM124937	-	-1	-	EntrezGene	-	-	-	.,1,1,5,1	alternative1,principal3,principal3,alternative1,.	NP_076927.1	-	-	-	-	-	-	G	G	-	deleterious(0)	probably_damaging(1)	-	-	-	-	-	-	-	-	-	6.34094e-11
21:43803161-43803161	A	missense_variant	MODERATE	TMPRSS3	64699	Transcript	NM_024022.4	protein_coding	8/13	-	NM_024022.4:c.763G>T	NP_076927.1:p.Ala255Ser	925	763	255	A/S	Gct/Tct	rs778263709,CM1618619	-	-1	-	EntrezGene	-	-	-	.,1,1,5,1	alternative1,principal3,principal3,alternative1,.	NP_076927.1	-	-	-	-	-	-	C	C	-	deleterious(0.02)	probably_damaging(0.992)	-	-	-	-	-	-	-	-	-	1.01442e-09
21:43803181-43803181	A	missense_variant	MODERATE	TMPRSS3	64699	Transcript	NM_024022.4	protein_coding	8/13	-	NM_024022.4:c.743C>T	NP_076927.1:p.Thr248Met	905	743	248	T/M	aCg/aTg	rs768140716,CM142878,COSV52307132	-	-1	-	EntrezGene	-	-	-	.,1,1,5,1	alternative1,principal3,principal3,alternative1,.	NP_076927.1	-	-	-	-	-	-	G	G	-	deleterious(0)	probably_damaging(0.985)	-	-	-	-	-	-	-	-	-	3.1036e-09
21:43803193-43803193	T	missense_variant	MODERATE	TMPRSS3	64699	Transcript	NM_024022.4	protein_coding	8/13	-	NM_024022.4:c.731G>A	NP_076927.1:p.Gly244Asp	893	731	244	G/D	gGc/gAc	rs397517377	-	-1	-	EntrezGene	-	-	-	.,1,1,5,1	alternative1,principal3,principal3,alternative1,.	NP_076927.1	-	-	-	-	-	-	C	C	-	deleterious(0)	probably_damaging(0.999)	-	-	-	-	-	-	-	-	-	6.33616e-11
21:43803197-43803197	T	missense_variant	MODERATE	TMPRSS3	64699	Transcript	NM_024022.4	protein_coding	8/13	-	NM_024022.4:c.727G>A	NP_076927.1:p.Gly243Arg	889	727	243	G/R	Ggg/Agg	rs372526764,CM140339,COSV99367552,COSV99368525	-	-1	-	EntrezGene	-	-	-	.,1,1,5,1	alternative1,principal3,principal3,alternative1,.	NP_076927.1	-	-	-	-	-	-	C	C	-	deleterious(0)	probably_damaging(1)	-	0.0002	0	0	0	0	0.001	0	0.0001163	7.7618e-10
21:43803198-43803198	C	missense_variant	MODERATE	TMPRSS3	64699	Transcript	NM_024022.4	protein_coding	8/13	-	NM_024022.4:c.726C>G	NP_076927.1:p.Cys242Trp	888	726	242	C/W	tgC/tgG	CM146610,COSV52300644,COSV52308251	-	-1	-	EntrezGene	-	-	-	.,1,1,5,1	alternative1,principal3,principal3,alternative1,.	NP_076927.1	-	-	-	-	-	-	G	G	-	deleterious(0)	probably_damaging(1)	-	-	-	-	-	-	-	-	-	-
21:43803205-43803206	-	frameshift_variant	HIGH	TMPRSS3	64699	Transcript	NM_024022.4	protein_coding	8/13	-	NM_024022.4:c.718del	NP_076927.1:p.His240ThrfsTer35	880	718	240	H/X	Cac/ac	COSV99368518	-	-1	-	EntrezGene	-	-	-	-	-	NP_076927.1	-	-	-	-	-	-	G	G	-	-	-	-	-	-	-	-	-	-	-	-	-
21:43803247-43803247	A	missense_variant	MODERATE	TMPRSS3	64699	Transcript	NM_024022.4	protein_coding	8/13	-	NM_024022.4:c.677C>T	NP_076927.1:p.Ser226Leu	839	677	226	S/L	tCg/tTg	rs763150678,CM154680,COSV52300609	-	-1	-	EntrezGene	-	-	-	.,1,1,5,1	alternative1,principal3,principal3,alternative1,.	NP_076927.1	-	-	-	-	-	-	G	G	-	deleterious(0.02)	benign(0.003)	-	-	-	-	-	-	-	-	-	1.42564e-10
21:43803247-43803247	T	stop_gained	HIGH	TMPRSS3	64699	Transcript	NM_024022.4	protein_coding	8/13	-	NM_024022.4:c.677C>A	NP_076927.1:p.Ser226Ter	839	677	226	S/*	tCg/tAg	CM154680,COSV52300609	-	-1	-	EntrezGene	-	-	-	.,1,1,5,1	alternative1,principal3,principal3,alternative1,.	NP_076927.1	-	-	-	-	-	-	G	G	-	-	-	-	-	-	-	-	-	-	-	-	-
21:43803277-43803277	T	missense_variant	MODERATE	TMPRSS3	64699	Transcript	NM_024022.4	protein_coding	8/13	-	NM_024022.4:c.647G>A	NP_076927.1:p.Arg216His	809	647	216	R/H	cGc/cAc	rs137853000,CM054158,CM1513228,COSV52301947	-	-1	-	EntrezGene	-	-	-	.,1,1,5,1	alternative1,principal3,principal3,alternative1,.	NP_076927.1	-	-	-	-	-	-	C	C	-	deleterious(0)	probably_damaging(0.995)	-	0.0002	0	0	0	0.001	0	-	-	6.33138e-11
21:43803278-43803278	A	missense_variant	MODERATE	TMPRSS3	64699	Transcript	NM_024022.4	protein_coding	8/13	-	NM_024022.4:c.646C>T	NP_076927.1:p.Arg216Cys	808	646	216	R/C	Cgc/Tgc	rs145913750,CM073383,COSV99368846	-	-1	-	EntrezGene	-	-	-	.,1,1,5,1	alternative1,principal3,principal3,alternative1,.	NP_076927.1	-	-	-	-	-	-	G	G	-	deleterious(0)	probably_damaging(0.999)	-	-	-	-	-	-	-	0	0.0001163	5.69777e-10
21:43804079-43804079	A	missense_variant,splice_region_variant	MODERATE	TMPRSS3	64699	Transcript	NM_024022.4	protein_coding	7/13	-	NM_024022.4:c.616G>T	NP_076927.1:p.Ala206Ser	778	616	206	A/S	Gcc/Tcc	CM163801,COSV52307056	-	-1	-	EntrezGene	-	-	-	.,1,1,5,1	alternative1,principal3,principal3,alternative1,.	NP_076927.1	-	-	-	-	-	-	C	C	-	tolerated(0.47)	benign(0.047)	-	-	-	-	-	-	-	-	-	-
21:43804088-43804088	A	stop_gained	HIGH	TMPRSS3	64699	Transcript	NM_024022.4	protein_coding	7/13	-	NM_024022.4:c.607C>T	NP_076927.1:p.Gln203Ter	769	607	203	Q/*	Cag/Tag	CM1310317	-	-1	-	EntrezGene	-	-	-	.,1,1,5,1	alternative1,principal3,principal3,alternative1,.	NP_076927.1	-	-	-	-	-	-	G	G	-	-	-	-	-	-	-	-	-	-	-	-	-
21:43804100-43804100	T	missense_variant	MODERATE	TMPRSS3	64699	Transcript	NM_024022.4	protein_coding	7/13	-	NM_024022.4:c.595G>A	NP_076927.1:p.Val199Met	757	595	199	V/M	Gtg/Atg	rs772040483,CM116226	-	-1	-	EntrezGene	-	-	-	.,1,1,5,1	alternative1,principal3,principal3,alternative1,.	NP_076927.1	-	-	-	-	-	-	C	C	-	deleterious(0)	possibly_damaging(0.76)	-	-	-	-	-	-	-	-	-	1.58324e-11
21:43804113-43804113	T	stop_gained	HIGH	TMPRSS3	64699	Transcript	NM_024022.4	protein_coding	7/13	-	NM_024022.4:c.582T>A	NP_076927.1:p.Cys194Ter	744	582	194	C/*	tgT/tgA	rs1060499811,CM102183	-	-1	-	EntrezGene	-	-	-	.,1,1,5,1	alternative1,principal3,principal3,alternative1,.	NP_076927.1	-	-	-	-	-	-	A	A	-	-	-	-	-	-	-	-	-	-	-	-	-
21:43804114-43804114	A	missense_variant	MODERATE	TMPRSS3	64699	Transcript	NM_024022.4	protein_coding	7/13	-	NM_024022.4:c.581G>T	NP_076927.1:p.Cys194Phe	743	581	194	C/F	tGt/tTt	rs1333651774,CM011821	-	-1	-	EntrezGene	-	-	-	.,1,1,5,1	alternative1,principal3,principal3,alternative1,.	NP_076927.1	-	-	-	-	-	-	C	C	-	deleterious(0)	probably_damaging(1)	-	-	-	-	-	-	-	-	-	1.58484e-11
21:43804115-43804115	T	frameshift_variant	HIGH	TMPRSS3	64699	Transcript	NM_024022.4	protein_coding	7/13	-	NM_024022.4:c.579dup	NP_076927.1:p.Cys194MetfsTer17	741-742	579-580	193-194	-/X	-/A	rs397517376	-	-1	-	EntrezGene	-	-	-	-	-	NP_076927.1	-	-	-	-	-	-	-	-	-	-	-	-	-	-	-	-	-	-	-	-	1.28379e-09
21:43805536-43805536	A	missense_variant	MODERATE	TMPRSS3	64699	Transcript	NM_024022.4	protein_coding	6/13	-	NM_024022.4:c.554A>T	NP_076927.1:p.His185Leu	716	554	185	H/L	cAc/cTc	CM1310501	-	-1	-	EntrezGene	-	-	-	.,1,1,5,1	alternative1,principal3,principal3,alternative1,.	NP_076927.1	-	-	-	-	-	-	T	T	-	deleterious(0.02)	benign(0.007)	-	-	-	-	-	-	-	-	-	-
21:43805539-43805539	G	missense_variant	MODERATE	TMPRSS3	64699	Transcript	NM_024022.4	protein_coding	6/13	-	NM_024022.4:c.551T>C	NP_076927.1:p.Leu184Ser	713	551	184	L/S	tTa/tCa	rs770046529	-	-1	-	EntrezGene	-	-	-	.,1,1,5,1	alternative1,principal3,principal3,alternative1,.	NP_076927.1	-	-	-	-	-	-	A	A	-	deleterious(0)	benign(0.127)	-	-	-	-	-	-	-	-	-	2.53128e-10
21:43805555-43805555	T	missense_variant	MODERATE	TMPRSS3	64699	Transcript	NM_024022.4	protein_coding	6/13	-	NM_024022.4:c.535G>A	NP_076927.1:p.Asp179Asn	697	535	179	D/N	Gac/Aac	CM1412275	-	-1	-	EntrezGene	-	-	-	.,1,1,5,1	alternative1,principal3,principal3,alternative1,.	NP_076927.1	-	-	-	-	-	-	C	C	-	tolerated(0.11)	benign(0.007)	-	-	-	-	-	-	-	-	-	-
21:43808522-43808522	T	missense_variant	MODERATE	TMPRSS3	64699	Transcript	NM_024022.4	protein_coding	5/13	-	NM_024022.4:c.436G>A	NP_076927.1:p.Gly146Ser	598	436	146	G/S	Ggt/Agt	rs1391332906,CM163800,COSV99368472	-	-1	-	EntrezGene	-	-	-	.,1,1,5,1	alternative1,principal3,principal3,alternative1,.	NP_076927.1	-	-	-	-	-	-	C	C	-	deleterious(0)	probably_damaging(0.999)	-	-	-	-	-	-	-	-	-	1.58245e-11
21:43808525-43808526	-	frameshift_variant	HIGH	TMPRSS3	64699	Transcript	NM_024022.4	protein_coding	5/13	-	NM_024022.4:c.432del	NP_076927.1:p.Gln144HisfsTer8	594	432	144	Q/X	caA/ca	rs780609668	-	-1	-	EntrezGene	-	-	-	-	-	NP_076927.1	-	-	-	-	-	-	T	T	-	-	-	-	-	-	-	-	-	-	-	-	1.01251e-09
21:43808545-43808545	T	missense_variant	MODERATE	TMPRSS3	64699	Transcript	NM_024022.4	protein_coding	5/13	-	NM_024022.4:c.413C>A	NP_076927.1:p.Ala138Glu	575	413	138	A/E	gCa/gAa	rs147231991,CM054159	-	-1	-	EntrezGene	-	-	-	.,1,1,5,1	alternative1,principal3,principal3,alternative1,.	NP_076927.1	-	-	-	-	-	-	G	G	-	deleterious(0)	possibly_damaging(0.588)	-	0.0006	0	0.0029	0	0.001	0	0.000227	0.001163	8.4401e-07
21:43808559-43808559	G	missense_variant	MODERATE	TMPRSS3	64699	Transcript	NM_024022.4	protein_coding	5/13	-	NM_024022.4:c.399G>C	NP_076927.1:p.Trp133Cys	561	399	133	W/C	tgG/tgC	CM163797	-	-1	-	EntrezGene	-	-	-	.,1,1,5,1	alternative1,principal3,principal3,alternative1,.	NP_076927.1	-	-	-	-	-	-	C	C	-	deleterious(0)	probably_damaging(0.998)	-	-	-	-	-	-	-	-	-	-
21:43808587-43808587	A	missense_variant	MODERATE	TMPRSS3	64699	Transcript	NM_024022.4	protein_coding	5/13	-	NM_024022.4:c.371C>T	NP_076927.1:p.Ser124Leu	533	371	124	S/L	tCg/tTg	rs747531199,COSV99368841	-	-1	-	EntrezGene	-	-	-	.,1,1,5,1	alternative1,principal3,principal3,alternative1,.	NP_076927.1	-	-	-	-	-	-	G	G	-	tolerated(0.13)	benign(0.009)	-	-	-	-	-	-	-	-	-	1.42325e-10
21:43808612-43808612	T	missense_variant	MODERATE	TMPRSS3	64699	Transcript	NM_024022.4	protein_coding	5/13	-	NM_024022.4:c.346G>A	NP_076927.1:p.Val116Met	508	346	116	V/M	Gtg/Atg	rs200090033,CM140338	-	-1	-	EntrezGene	-	-	-	.,1,1,5,1	alternative1,principal3,principal3,alternative1,.	NP_076927.1	-	-	-	-	-	-	C	C	-	deleterious(0)	possibly_damaging(0.826)	-	-	-	-	-	-	-	-	-	2.67392e-09
21:43808632-43808632	T	missense_variant	MODERATE	TMPRSS3	64699	Transcript	NM_024022.4	protein_coding	5/13	-	NM_024022.4:c.326G>A	NP_076927.1:p.Arg109Gln	488	326	109	R/Q	cGg/cAg	rs139484231,CM154678	-	-1	-	EntrezGene	-	-	-	.,1,1,5,1	alternative1,principal3,principal3,alternative1,.	NP_076927.1	-	-	-	-	-	-	C	C	-	deleterious(0)	probably_damaging(0.93)	-	-	-	-	-	-	-	0.000227	0	1.33172e-08
21:43808641-43808641	T	splice_region_variant,intron_variant	LOW	TMPRSS3	64699	Transcript	NM_024022.4	protein_coding	-	4/12	NM_024022.4:c.323-6G>A	-	-	-	-	-	-	rs374793617,CS010098	-	-1	-	EntrezGene	-	-	-	-	-	NP_076927.1	-	-	-	-	-	-	C	C	-	-	-	-	0.0002	0	0.0014	0	0	0	0.000227	0	3.10472e-09
21:43809044-43809044	A	missense_variant	MODERATE	TMPRSS3	64699	Transcript	NM_024022.4	protein_coding	4/13	-	NM_024022.4:c.316C>T	NP_076927.1:p.Arg106Cys	478	316	106	R/C	Cgc/Tgc	rs139805921,CM1310688	-	-1	-	EntrezGene	-	-	-	.,1,1,5,1	alternative1,principal3,principal3,alternative1,.	NP_076927.1	-	-	-	-	-	-	G	G	-	deleterious(0.01)	probably_damaging(0.947)	-	0.0002	0	0	0.001	0	0	0	0.0003488	4.6139e-08
21:43809050-43809050	T	missense_variant	MODERATE	TMPRSS3	64699	Transcript	NM_024022.4	protein_coding	4/13	-	NM_024022.4:c.310G>A	NP_076927.1:p.Glu104Lys	472	310	104	E/K	Gag/Aag	rs373058706,CM124935,CM124936,COSV52305948	-	-1	-	EntrezGene	-	-	-	.,1,1,5,1	alternative1,principal3,principal3,alternative1,.	NP_076927.1	-	-	-	-	-	-	C	C	-	deleterious(0)	probably_damaging(1)	-	-	-	-	-	-	-	0	0.0001163	6.32661e-11
21:43809050-43809050	A	stop_gained	HIGH	TMPRSS3	64699	Transcript	NM_024022.4	protein_coding	4/13	-	NM_024022.4:c.310G>T	NP_076927.1:p.Glu104Ter	472	310	104	E/*	Gag/Tag	CM124935,CM124936,COSV52305948	-	-1	-	EntrezGene	-	-	-	.,1,1,5,1	alternative1,principal3,principal3,alternative1,.	NP_076927.1	-	-	-	-	-	-	C	C	-	-	-	-	-	-	-	-	-	-	-	-	-
21:43809080-43809080	T	missense_variant	MODERATE	TMPRSS3	64699	Transcript	NM_024022.4	protein_coding	4/13	-	NM_024022.4:c.280G>A	NP_076927.1:p.Gly94Arg	442	280	94	G/R	Gga/Aga	rs143762350,CM1310687,COSV52300911	-	-1	-	EntrezGene	-	-	-	.,1,1,5,1	alternative1,principal3,principal3,alternative1,.	NP_076927.1	-	-	-	-	-	-	C	C	-	deleterious(0)	probably_damaging(0.944)	-	0.0002	0	0	0.001	0	0	0	0.0002326	3.7986e-08
21:43809089-43809089	A	stop_gained	HIGH	TMPRSS3	64699	Transcript	NM_024022.4	protein_coding	4/13	-	NM_024022.4:c.271C>T	NP_076927.1:p.Arg91Ter	433	271	91	R/*	Cga/Tga	rs199903164,CM163795	-	-1	-	EntrezGene	-	-	-	.,1,1,5,1	alternative1,principal3,principal3,alternative1,.	NP_076927.1	-	-	-	-	-	-	G	G	-	-	-	-	-	-	-	-	-	-	-	-	3.95214e-10
21:43809142-43809142	T	missense_variant	MODERATE	TMPRSS3	64699	Transcript	NM_024022.4	protein_coding	4/13	-	NM_024022.4:c.218G>A	NP_076927.1:p.Cys73Tyr	380	218	73	C/Y	tGc/tAc	-	-	-1	-	EntrezGene	-	-	-	.,1,1,5,1	alternative1,principal3,principal3,alternative1,.	NP_076927.1	-	-	-	-	-	-	C	C	-	deleterious(0)	probably_damaging(1)	-	-	-	-	-	-	-	-	-	-
21:43809151-43809152	-	frameshift_variant,splice_region_variant	HIGH	TMPRSS3	64699	Transcript	NM_024022.4	protein_coding	4/13	-	NM_024022.4:c.208del	NP_076927.1:p.His70ThrfsTer19	370	208	70	H/X	Cac/ac	rs727503493,CD020353	-	-1	-	EntrezGene	-	-	-	-	-	NP_076927.1	-	-	-	-	-	-	G	G	-	-	-	-	-	-	-	-	-	-	0.000469	0.0006058	2.39708e-07
21:43810053-43810053	C	missense_variant	MODERATE	TMPRSS3	64699	Transcript	NM_024022.4	protein_coding	3/13	-	NM_024022.4:c.188T>G	NP_076927.1:p.Leu63Arg	350	188	63	L/R	cTg/cGg	CM165511	-	-1	-	EntrezGene	-	-	-	.,1,1,5,1	alternative1,principal3,principal3,alternative1,.	NP_076927.1	-	-	-	-	-	-	A	A	-	deleterious(0.01)	benign(0.202)	-	-	-	-	-	-	-	-	-	-
21:43810126-43810126	A	stop_gained	HIGH	TMPRSS3	64699	Transcript	NM_024022.4	protein_coding	3/13	-	NM_024022.4:c.115C>T	NP_076927.1:p.Gln39Ter	277	115	39	Q/*	Cag/Tag	CM165510	-	-1	-	EntrezGene	-	-	-	.,1,1,5,1	alternative1,principal3,principal3,alternative1,.	NP_076927.1	-	-	-	-	-	-	G	G	-	-	-	-	-	-	-	-	-	-	-	-	-
21:43815481-43815481	A	stop_gained	HIGH	TMPRSS3	64699	Transcript	NM_024022.4	protein_coding	2/13	-	NM_024022.4:c.46C>T	NP_076927.1:p.Arg16Ter	208	46	16	R/*	Cga/Tga	rs976363536,CM1111510,COSV99367498	-	-1	-	EntrezGene	-	-	-	.,1,1,5,1	alternative1,principal3,principal3,alternative1,.	NP_076927.1	-	-	-	-	-	-	G	G	-	-	-	-	-	-	-	-	-	-	-	-	1.42325e-10
21:43815490-43815490	G	frameshift_variant	HIGH	TMPRSS3	64699	Transcript	NM_024022.4	protein_coding	2/13	-	NM_024022.4:c.36dup	NP_076927.1:p.Phe13LeufsTer10	198-199	36-37	12-13	-/X	-/C	-	-	-1	-	EntrezGene	-	-	-	-	-	NP_076927.1	-	-	-	-	-	-	-	-	-	-	-	-	-	-	-	-	-	-	-	-	-
21:43815490-43815491	-	frameshift_variant	HIGH	TMPRSS3	64699	Transcript	NM_024022.4	protein_coding	2/13	-	NM_024022.4:c.36del	NP_076927.1:p.Phe13SerfsTer12	198	36	12	P/X	ccC/cc	CD175691,COSV52305824	-	-1	-	EntrezGene	-	-	-	-	-	NP_076927.1	-	-	-	-	-	-	G	G	-	-	-	-	-	-	-	-	-	-	-	-	-
																																																	9.42064e-07
[truncated: 397 more columns]
